# Supplementary material
Source: Springer Nature journal article supplement (https://www.springermedizin.de/resource/supplementary/13058_2011_2917_MOESM3_ESM.pdf/9702892)
Supplement: MOESM3 [file 9702892]

**CTC**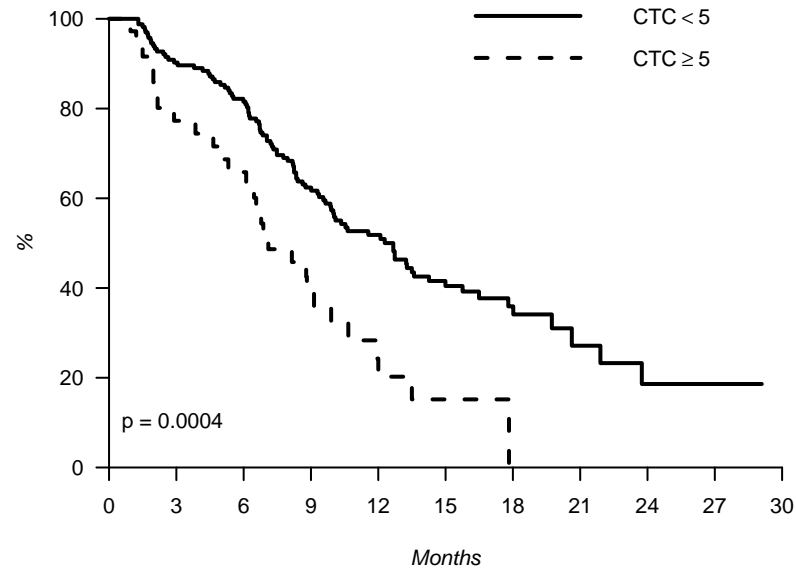**Number at risk**

|     |     |     |     |    |    |    |    |   |   |   |   |
|-----|-----|-----|-----|----|----|----|----|---|---|---|---|
| —   | 165 | 146 | 130 | 90 | 58 | 36 | 20 | 7 | 4 | 3 | 0 |
| - · | 36  | 27  | 23  | 12 | 6  | 2  | 0  | 0 | 0 | 0 | 0 |

**CEA**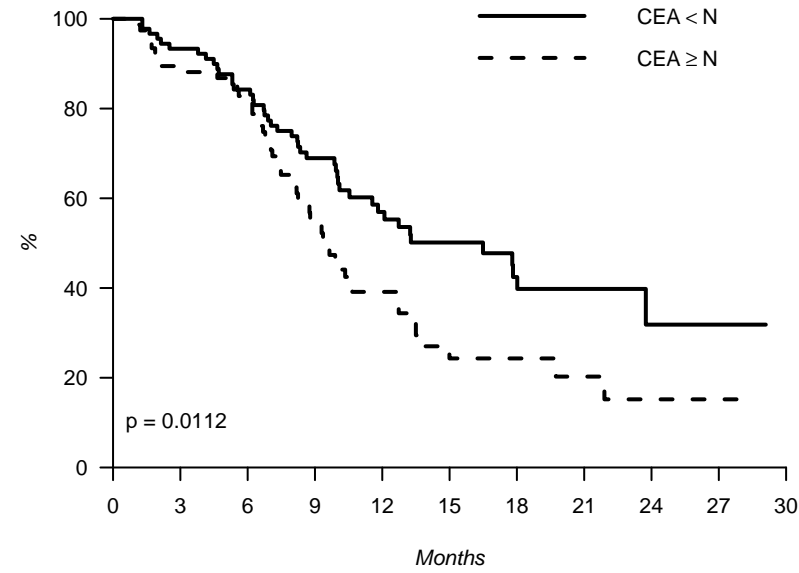**Number at risk**

|     |    |    |    |    |    |    |    |   |   |   |   |
|-----|----|----|----|----|----|----|----|---|---|---|---|
| —   | 90 | 83 | 73 | 54 | 34 | 26 | 16 | 8 | 4 | 2 | 0 |
| - · | 77 | 66 | 61 | 36 | 19 | 9  | 7  | 4 | 3 | 2 | 0 |

**LDH**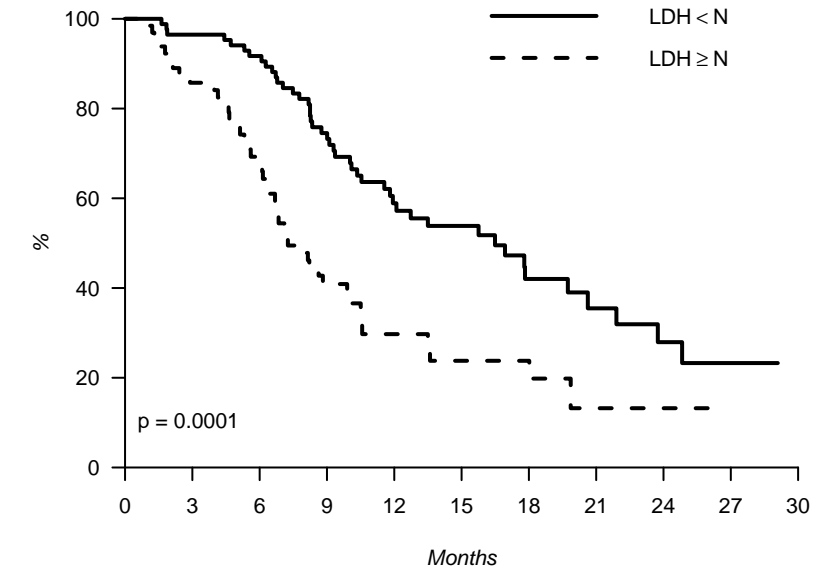**Number at risk**

|     |    |    |    |    |    |    |    |    |   |   |   |
|-----|----|----|----|----|----|----|----|----|---|---|---|
| —   | 85 | 82 | 77 | 57 | 36 | 28 | 16 | 10 | 7 | 3 | 0 |
| - · | 65 | 52 | 41 | 22 | 13 | 7  | 6  | 2  | 1 | 0 | 0 |

**CA15-3**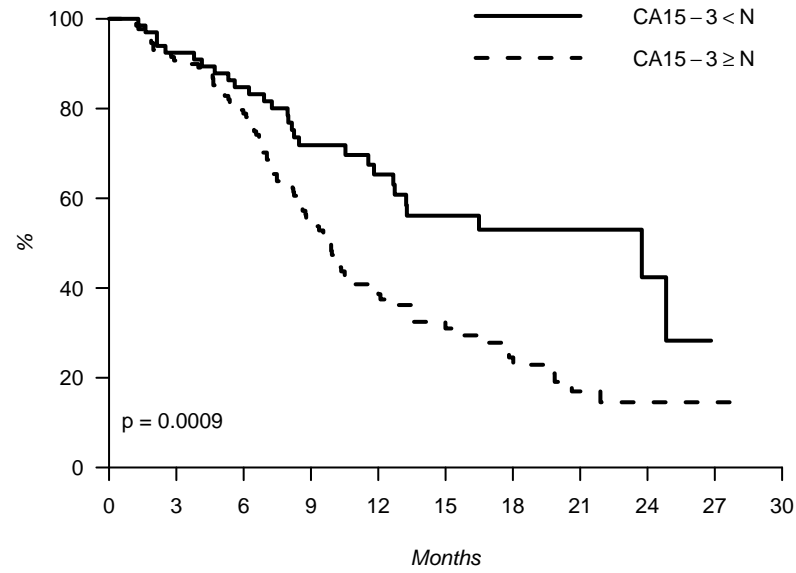**Number at risk**

|     |     |     |     |    |    |    |    |   |   |   |   |
|-----|-----|-----|-----|----|----|----|----|---|---|---|---|
| —   | 67  | 61  | 54  | 41 | 29 | 23 | 13 | 7 | 4 | 0 | 0 |
| - · | 130 | 116 | 100 | 63 | 36 | 21 | 15 | 7 | 5 | 3 | 0 |

**CYFRA21-1**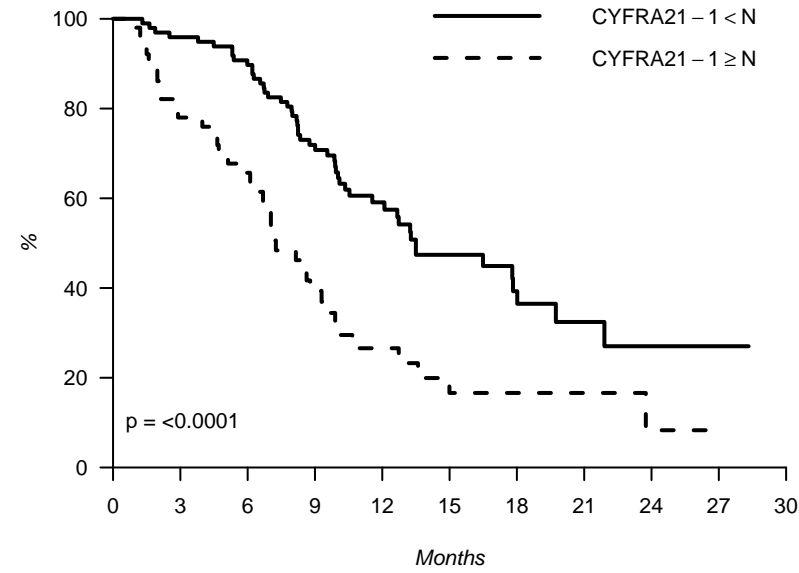**Number at risk**

|     |    |    |    |    |    |    |    |   |   |   |   |
|-----|----|----|----|----|----|----|----|---|---|---|---|
| —   | 98 | 93 | 87 | 63 | 38 | 24 | 14 | 6 | 3 | 2 | 0 |
| - · | 51 | 38 | 31 | 17 | 9  | 5  | 3  | 2 | 1 | 0 | 0 |

**ALP**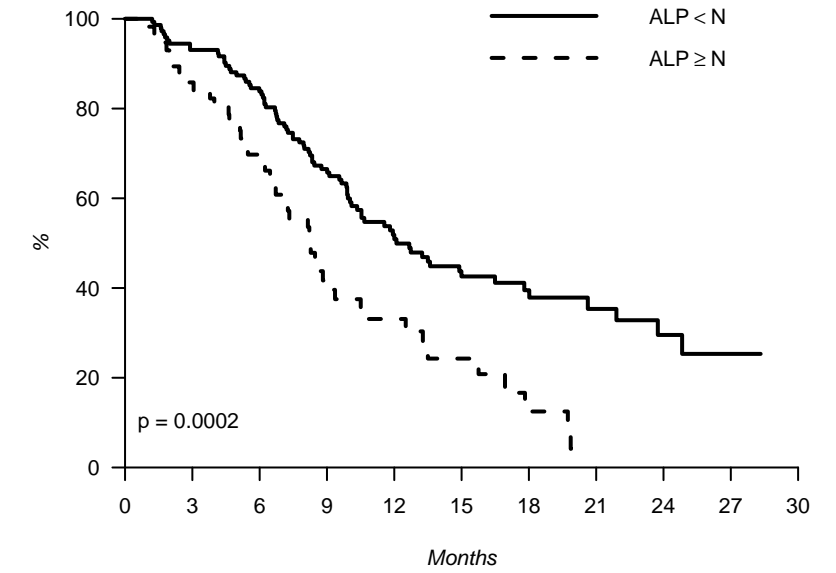**Number at risk**

|     |     |     |     |    |    |    |    |    |   |   |   |
|-----|-----|-----|-----|----|----|----|----|----|---|---|---|
| —   | 146 | 133 | 118 | 85 | 53 | 37 | 24 | 14 | 9 | 3 | 0 |
| - · | 57  | 48  | 39  | 20 | 14 | 7  | 3  | 0  | 0 | 0 | 0 |
